# Supplementary material for: Targeting Toxoplasma gondii ME49 TgAPN2: A Bioinformatics Approach for Antiparasitic Drug Discovery
Source: MDPI journal article supplement (doi:10.3390/molecules28073186), 2023-04-03
Supplement: s1 [file s1]

# **Targeting *Toxoplasma gondii* ME49 TgAPN2: A Bioinformatics Approach for Antiparasitic Drug Discovery**

Ali Altharawi

Department of Pharmaceutical Chemistry, College of Pharmacy, Prince Sattam Bin Abdulaziz University, Al-Kharj 11942, Saudi Arabia; a.altharawi@psau.edu.sa

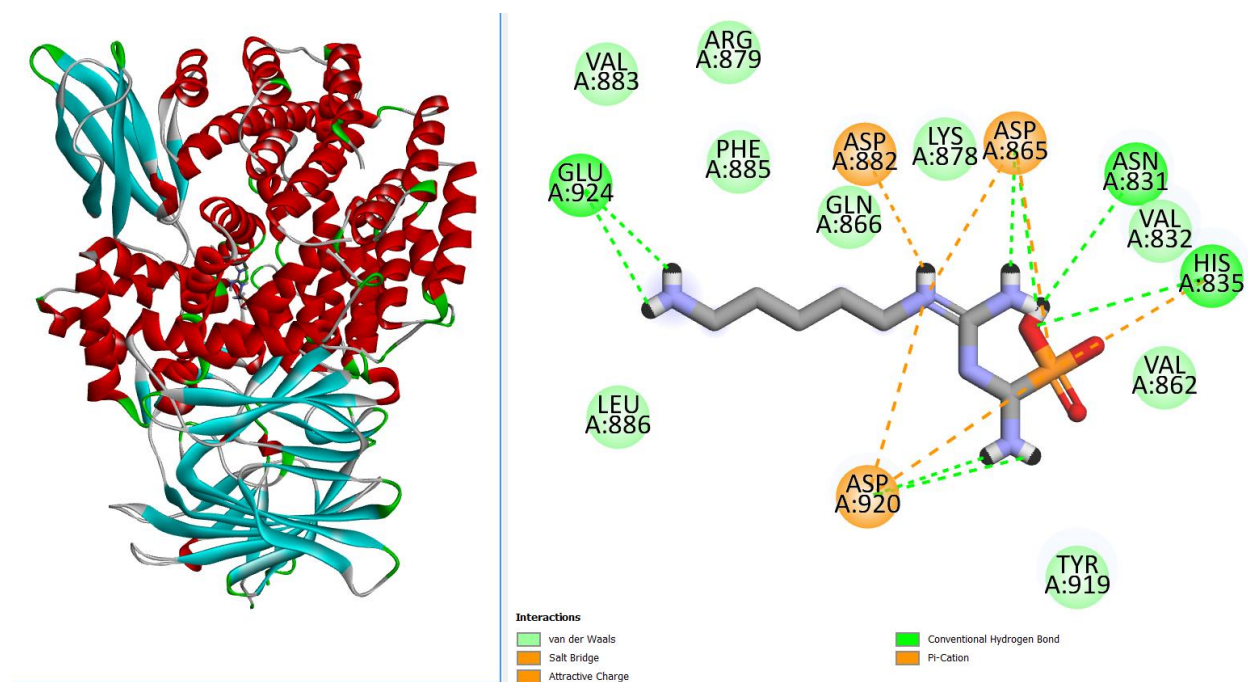

**Figure S1.** Docked conformation and interactions of control compound 1 with the TgAPN2 (show by secondary structure cartoon representation)

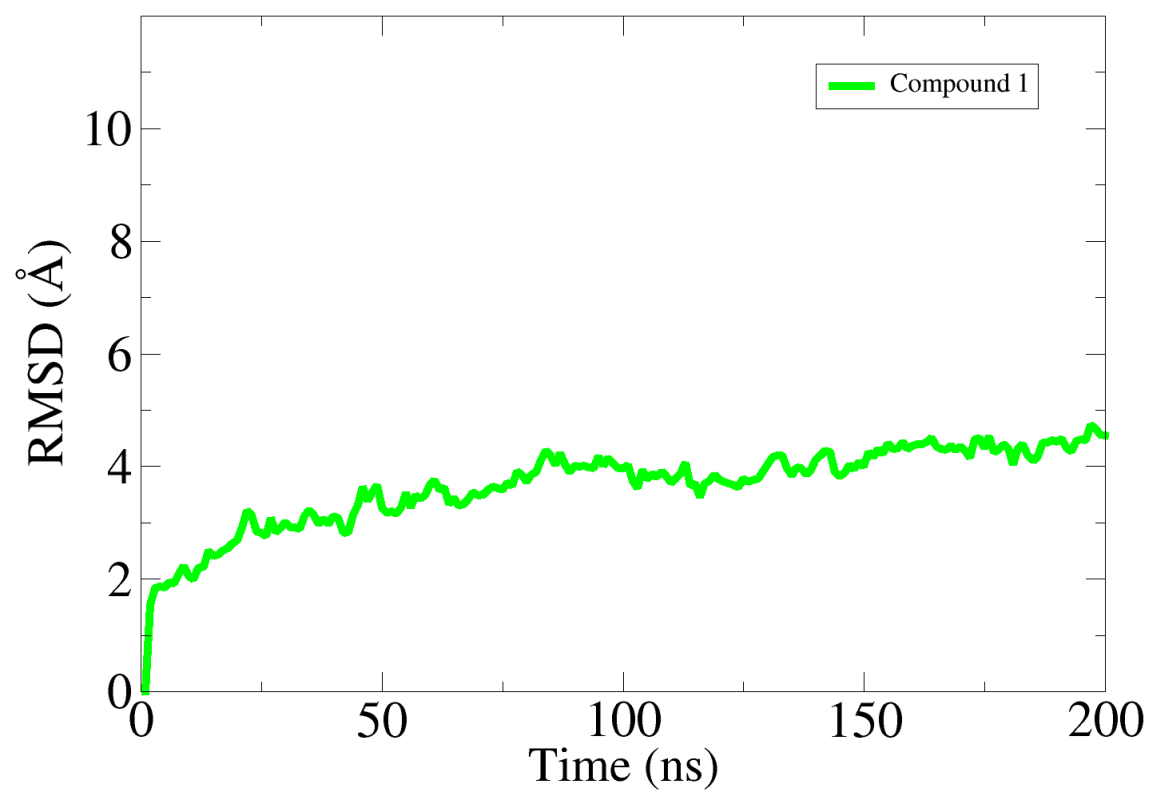

**Figure S2.** RMSD of control compound 1.
